# Supplementary material for: Resting-State Brain Age Predicts Cognitive and Sensorimotor Deficits in Schizophrenia Spectrum Disorders: A Validation & Longitudinal Study
Source: Research Square preprint supplement (doi:10.21203/rs.3.rs-8799777/v1), 2026-04-30
Supplement: Supplementary file 1 [file 54d51a4390ed67383cfe139e.docx]

| Site | Variable | N Young | N Old | Young mean | Old mean | Diff | t | q |
| --- | --- | --- | --- | --- | --- | --- | --- | --- |
| whiteCAT/NSS | TMT | 43 | 91 | 138.3 | 88.83 | -49.45 | -2.596 | 0.0466 |
| CF | 44 | 91 | 19.07 | 18.77 | -0.299 | -0.162 | 0.9061 |
| DSST | 43 | 91 | 49.23 | 53.89 | 4.658 | 1.104 | 0.4923 |
| DOI | 44 | 91 | 15.27 | 6.571 | -8.701 | -3.971 | 0.002957 |
| NSS HS | 45 | 91 | 3.778 | 2.692 | -1.085 | -3.002 | 0.02723 |
| NSS IF | 45 | 91 | 4.089 | 3.011 | -1.078 | -2.821 | 0.03082 |
| NSS CoMT | 45 | 91 | 3.844 | 3.011 | -0.8335 | -1.826 | 0.1546 |
| NSS MoCo | 45 | 91 | 8.244 | 6.604 | -1.64 | -2.107 | 0.09569 |
| NSS RLSpO | 45 | 91 | 2.822 | 2.758 | -0.06398 | -0.1184 | 0.9061 |
| NSS Total | 45 | 91 | 21.58 | 17.46 | -4.116 | -2.346 | 0.06545 |
| OLZ | 45 | 91 | 18.77 | 14.53 | -4.243 | -1.057 | 0.4923 |
| PANSS G | 45 | 91 | 33.73 | 34.16 | 0.4315 | 0.2247 | 0.9061 |
| PANSS N | 45 | 91 | 16.87 | 17.52 | 0.6498 | 0.5074 | 0.9061 |
| PANSS P | 45 | 91 | 15.07 | 15.37 | 0.307 | 0.2708 | 0.9061 |
| PANSS Total | 45 | 91 | 65.51 | 67.02 | 1.511 | 0.4258 | 0.9061 |
| whiteCAT | TMT | 20 | 40 | 153.5 | 93.19 | -60.31 | -1.601 | 0.3109 |
| CF | 21 | 40 | 20.24 | 19.43 | -0.8131 | -0.3583 | 0.9433 |
| DSST | 20 | 40 | 48.35 | 57.15 | 8.8 | 1.612 | 0.3109 |
| DOI | 21 | 40 | 16.38 | 6.8 | -9.581 | -2.97 | 0.08799 |
| NSS HS | 22 | 40 | 4 | 2.675 | -1.325 | -2.269 | 0.1552 |
| NSS IF | 22 | 40 | 5.318 | 4.15 | -1.168 | -2.238 | 0.1552 |
| NSS CoMT | 22 | 40 | 4.273 | 3.025 | -1.248 | -1.94 | 0.2298 |
| NSS MoCo | 22 | 40 | 7.682 | 7.625 | -0.05682 | -0.04284 | 0.9722 |
| NSS RLSpO | 22 | 40 | 3.227 | 3.5 | 0.2727 | 0.3398 | 0.9433 |
| NSS Total | 22 | 40 | 22.05 | 19.57 | -2.47 | -0.9126 | 0.6631 |
| OLZ | 22 | 40 | 12.99 | 10.78 | -2.217 | -0.8545 | 0.6631 |
| PANSS G | 22 | 40 | 32.5 | 32.58 | 0.075 | 0.03507 | 0.9722 |
| PANSS N | 22 | 40 | 18 | 18.43 | 0.425 | 0.232 | 0.9433 |
| PANSS P | 22 | 40 | 16.55 | 14.95 | -1.595 | -1.053 | 0.6412 |
| PANSS Total | 22 | 40 | 67.05 | 65.95 | -1.095 | -0.2487 | 0.9433 |
| NSS | TMT | 23 | 51 | 125 | 85.41 | -39.63 | -2.725 | 0.07527 |
| CF | 23 | 51 | 18 | 18.25 | 0.2549 | 0.09376 | 0.9256 |
| DSST | 23 | 51 | 50 | 51.33 | 1.333 | 0.2144 | 0.9256 |
| DOI | 23 | 51 | 14.26 | 6.392 | -7.869 | -2.586 | 0.07546 |
| NSS HS | 23 | 51 | 3.565 | 2.706 | -0.8593 | -1.907 | 0.1618 |
| NSS IF | 23 | 51 | 2.913 | 2.118 | -0.7954 | -2.006 | 0.1606 |
| NSS CoMT | 23 | 51 | 3.435 | 3 | -0.4348 | -0.6748 | 0.7562 |
| NSS MoCo | 23 | 51 | 8.783 | 5.804 | -2.979 | -3.417 | 0.02369 |
| NSS RLSpO | 23 | 51 | 2.435 | 2.176 | -0.2583 | -0.3518 | 0.9095 |
| NSS Total | 23 | 51 | 21.13 | 15.8 | -5.327 | -2.285 | 0.1122 |
| OLZ | 23 | 51 | 24.3 | 17.47 | -6.827 | -0.934 | 0.6743 |
| PANSS G | 23 | 51 | 34.91 | 35.41 | 0.4987 | 0.1601 | 0.9256 |
| PANSS N | 23 | 51 | 15.78 | 16.8 | 1.021 | 0.5675 | 0.7818 |
| PANSS P | 23 | 51 | 13.65 | 15.71 | 2.054 | 1.276 | 0.4436 |
| PANSS Total | 23 | 51 | 64.04 | 67.86 | 3.819 | 0.6953 | 0.7562 |
