# Supplementary material for: Resting-State Brain Age Predicts Cognitive and Sensorimotor Deficits in Schizophrenia Spectrum Disorders: A Validation & Longitudinal Study
Source: Research Square preprint supplement (doi:10.21203/rs.3.rs-8799777/v1), 2026-04-30
Supplement: Supplementary file 2 [file 74e28b8e588c71c39a82feb2.docx]

| Clinical Variable | whiteCAT (n=90) | NSS(n=103) |
| --- | --- | --- |
| TMT | 109.44 (SD 91.8) | 104.36 (SD 59.59) |
| CF | 19.84 (SD 6.43) | 18.49 (SD 13.6) |
| DSST | 56.39 (SD 18.86) | 51.27 (SD 27.29) |
| Duration Illness (years) | 10.66 (SD 10.88) | 9.02 (SD 9.86) |
| NSS HS | 3.21 (SD 2.22) | 2.88 (SD 1.71) |
| NSS IF | 4.4 (SD 1.89) | 2.45 (SD 1.42) |
| NSS CoMT | 3.43 (SD 2.09) | 3.32 (SD 2.34) |
| NSS MoCo | 7.38 (SD 4.49) | 7.33 (SD 3.67) |
| NSS RLSpO | 3.33 (SD 2.71) | 2.41 (SD 2.25) |
| NSS Total | 19.79 (SD 9.23) | 18.39 (SD 7.89) |
| Olanzapine Equivalent | 12.94 (SD 9.45) | 18.94 (SD 18.48) |
| PANSS General | 32.28 (SD 7.87) | 35.56 (SD 11.49) |
| PANSS Negative | 17.37 (SD 6.85) | 16.53 (SD 7.52) |
| PANSS Positive | 15.3 (SD 5.25) | 15.73 (SD 7.23) |
| PANSS Total | 64.94 (SD 16.21) | 67.73 (SD 22.13) |
