# Supplementary material for: Resting-State Brain Age Predicts Cognitive and Sensorimotor Deficits in Schizophrenia Spectrum Disorders: A Validation & Longitudinal Study
Source: Research Square preprint supplement (doi:10.21203/rs.3.rs-8799777/v1), 2026-04-30
Supplement: Supplementary file 3 [file 8738ff68c326222fd8d25e44.docx]

| Site | n HC | Mean HC | SD HC | n SSD | Mean SSD | SD SSD | Mean diff (SSD − HC) | Cohen's d | Hedges' g | t (Welch) | p (FDR) |
| --- | --- | --- | --- | --- | --- | --- | --- | --- | --- | --- | --- |
| UCLA | 45 | 3.7e-18 | 1 | 45 | 0.4 | 0.94 | 0.4 | 0.41 | 0.41 | 1.94 | 0.05 |
| COBRE | 59 | -7.15e-17 | 1 | 59 | 0.74 | 1.18 | 0.74 | 0.67 | 0.67 | 3.66 | 5.5e5 |
| whiteCAT  URBAN | 33 | 5.05e-17 | 1 | 83 | 0.94 | 1.42 | 0.94 | 0.72 | 0.71 | 4.04 | 2.4e4 |
| NSS  BMBF | 102 | 1.08e-16 | 1 | 103 | 0.9 | 1.47 | 0.93 | 0.72 | 0.72 | 5.15 | 2.7e7 |
