# Supplementary material for: Resting-State Brain Age Predicts Cognitive and Sensorimotor Deficits in Schizophrenia Spectrum Disorders: A Validation & Longitudinal Study
Source: Research Square preprint supplement (doi:10.21203/rs.3.rs-8799777/v1), 2026-04-30
Supplement: Supplementary file 4 [file a0f036213081e625ed4b5590.docx]

| SITE | n | Age | Mean FD | Female Count |
| --- | --- | --- | --- | --- |
| CamCan | 588 | 52.94 (SD 18.5) | 0.24 (SD .1) | 290 |
| AOMIC 1 | 203 | 22.21 (SD 1.8) | 0.11 (SD .04) | 117 |
| AOMIC 2 | 214 | 21.93 (SD 1.8) | 0.13 (SD .04) | 124 |
| DLBS | 296 | 60.46 (SD 17.73) | 0.2 (SD .09) | 187 |
| OASIS | 489 | 64.96 (SD 9.18) | 0.25 (SD .1) | 305 |
| SALD | 432 | 42.93 (SD 16.93) | 0.18 (SD .09) | 267 |
