# Supplementary material for: Resting-State Brain Age Predicts Cognitive and Sensorimotor Deficits in Schizophrenia Spectrum Disorders: A Validation & Longitudinal Study
Source: Research Square preprint supplement (doi:10.21203/rs.3.rs-8799777/v1), 2026-04-30
Supplement: Supplementary file 5 [file c8b9cd51e1de1e853e6d1372.docx]

| Site | n HC | Mean HC | SD HC | n SSD | Mean SSD | SD SSD | Mean diff (SSD − HC) | Cohen's d | Hedges' g | t (Welch) | q  (FDR) |
| --- | --- | --- | --- | --- | --- | --- | --- | --- | --- | --- | --- |
| UCLA | 45 | 6.9e-17 | 1 | 45 | 0.59 | 1.3 | 0.6 | 0.52 | 0.51 | 2.446 | 0.02 |
| COBRE | 58 | 1.34e-17 | 1 | 59 | 0.12 | 1.14 | 0.12 | 0.11 | 0.11 | 0.5857 | 0.56 |
| whiteCAT  URBAN | 33 | 1.01e-17 | 1 | 83 | 0.64 | 1.36 | 0.64 | 0.50 | 0.50 | 2.791 | 0.01 |
| NSS  BMBF | 103 | 4.74e-17 | 1 | 103 | 0.63 | 1.54 | 0.63 | 0.48 | 0.48 | 3.467 | 0.002 |
