# Supplementary material for: Resting-State Brain Age Predicts Cognitive and Sensorimotor Deficits in Schizophrenia Spectrum Disorders: A Validation & Longitudinal Study
Source: Research Square preprint supplement (doi:10.21203/rs.3.rs-8799777/v1), 2026-04-30
Supplement: Supplementary file 6 [file d2f6ca1ad6fead0471036c57.docx]

| SITE | dx | n | Age | Mean FD | Female Count |
| --- | --- | --- | --- | --- | --- |
| UCLA | 0.0 | 45 | 35.58 (SD 9.67) | 0.16 (SD .08)* | 9 |
| 1.0 | 45 | 36.33 (SD 8.92) | 0.22 (SD .09)* | 10 |
| COBRE | 0.0 | 58 | 36.79 (SD 11.83) | 0.25 (SD .11) | 10 |
| 1.0 | 59 | 36.42 (SD 13.25) | 0.29 (SD .11) | 10 |
| whiteCAT/URBN | 0.0 | 33 | 34.04 (SD 10.32) | 0.15 (SD .09) | 14 |
| 1.0 | 83 | 35.43 (SD 11.85) | 0.16 (SD .08) | 26 |
| whiteCAT follow-up | 0 | 0 | - | - | - |
| 1 | 57 | 36.69 (SD 12.64) | 0.15 (SD 0.07) | 19 |
| NSS/BMBF | 0.0 | 103 | 33.11 (SD 10.28)* | 0.18 (SD .07)* | 50 |
| 1.0 | 103 | 37.69 (SD 11.13)* | 0.24 (SD .11)* | 51 |
| NSS follow-up | 0 | 0 | - | - | - |
| 1 | 31 | 37.13 (SD 0.1) | 0.25 (0.1) | 11 |
