# Supplementary material for: Resting-State Brain Age Predicts Cognitive and Sensorimotor Deficits in Schizophrenia Spectrum Disorders: A Validation & Longitudinal Study
Source: Research Square preprint supplement (doi:10.21203/rs.3.rs-8799777/v1), 2026-04-30
Supplement: Supplementary file 7 [file d3dd94a6bdcb06bbf586e9fd.docx]

| Clinical Variable | whiteCAT (n=57) | NSS(n=31) |
| --- | --- | --- |
| TMT | 91.8 (SD 48.55) | 97.46 (SD 44.38) |
| Follow-up | 89.07 (SD 53.17) | 83.63 (SD 34.58) |
| CF | 20.84 (SD 5.93) | 18.49 (SD 6.31) |
| Follow-up | 19.44 (SD 5.27) | 22.47 (SD 11.78) |
| DSST | 58.41 (SD 18.32) | 53.73 (SD 15.62) |
| Follow-up | 64.8 (SD 18.77) | 49.07 (SD 42.98) |
| NSS HS | 3.14 (SD 2.19) | 3.13 (SD 1.73) |
| Follow-up | 2.64 (SD 1.9) | 2.43 (SD 1.79) |
| NSS IF | 4.28 (SD 1.4) | 2.463 (SD 1.6) |
| Follow-up | 4.23 (SD 1.74) | 2.23 (SD 1.22) |
| NSS CoMT | 3.23 (SD 1.89) | 3.33 (SD 2.06) |
| Follow-up | 2.75 (SD 2.59) | 2.1 (SD 1.81) |
| NSS MoCo | 6.7 (SD 3.73) | 7.37 (SD 3.37) |
| Follow-up | 6.12 (SD 4.23) | 6.07 (SD 3.65) |
| NSS RLSpO | 3.03 (SD 2.35) | 2.3 (SD 1.7) |
| Follow-up | 2.73 (SD 2.29) | 1.5 (SD 1.41) |
| NSS Total | 18.72 (SD 7.25) | 18.76 (SD 6.04) |
| Follow-up | 16.81 (SD 9.27) | 13.9 (SD 6.89) |
| PANSS General | 31.23 (SD 7.76) | 38.37 (SD 13.88) |
| Follow-up | 28.11 (SD 7.55) | 30.27 (SD 9.01) |
| PANSS Negative | 16.63 (SD 6.79) | 18.27 (SD 8.06) |
| Follow-up | 15.09 (SD 6.85) | 14.4 (SD 4.96) |
| PANSS Positive | 14.46 (SD 4.89) | 15.87 (SD 8.19) |
| Follow-up | 12.23 (SD 4.38) | 10.83 (SD 5.15) |
| PANSS Total | 62.31 (SD 15.71) | 72.5 (SD 25.3) |
| Follow-up | 55.42 (SD 14.46) | 54.8 (SD 16.39) |
