# Supplementary material for: Resting-State Brain Age Predicts Cognitive and Sensorimotor Deficits in Schizophrenia Spectrum Disorders: A Validation & Longitudinal Study
Source: Research Square preprint supplement (doi:10.21203/rs.3.rs-8799777/v1), 2026-04-30
Supplement: Supplementary file 9 [file e8cd55ddb7a51b28fadc42e4.docx]

| Site | Variable | N Young | N Old | Young mean | Old mean | Diff | t | q |
| --- | --- | --- | --- | --- | --- | --- | --- | --- |
| whiteCAT/NSS | TMT | 54 | 85 | 114.4 | 85.17 | -29.28 | -3.038 | 0.01814 |
| CF | 54 | 86 | 19.41 | 19.4 | -0.01206 | -0.006772 | 0.9946 |
| DSST | 54 | 85 | 53.15 | 58.02 | 4.875 | 1.384 | 0.5004 |
| DOI | 54 | 86 | 11.44 | 6.326 | -5.119 | -3.12 | 0.01814 |
| NSS HS | 54 | 86 | 3.185 | 2.988 | -0.1968 | -0.6098 | 0.6939 |
| NSS IF | 54 | 86 | 3.315 | 3.07 | -0.245 | -0.844 | 0.6939 |
| NSS CoMT | 54 | 86 | 3.556 | 3.07 | -0.4858 | -1.289 | 0.5004 |
| NSS MoCo | 54 | 86 | 8 | 6.093 | -1.907 | -2.979 | 0.01814 |
| NSS RLSpO | 54 | 86 | 2.889 | 2.581 | -0.3075 | -0.836 | 0.6939 |
| NSS Total | 54 | 86 | 20.15 | 16.95 | -3.195 | -2.57 | 0.04342 |
| OLZ | 54 | 86 | 16.36 | 17.86 | 1.498 | 0.5916 | 0.6939 |
| PANSS G | 54 | 86 | 34.26 | 33.12 | -1.143 | -0.6768 | 0.6939 |
| PANSS N | 54 | 86 | 16.87 | 17.05 | 0.1761 | 0.1368 | 0.9551 |
| PANSS P | 54 | 86 | 15.37 | 14.73 | -0.6378 | -0.6003 | 0.6939 |
| PANSS Total | 54 | 86 | 66.37 | 64.86 | -1.51 | -0.4468 | 0.7567 |
| whiteCAT | TMT | 25 | 39 | 102.3 | 88.85 | -13.47 | -0.9919 | 0.7358 |
| CF | 25 | 40 | 19.48 | 20.85 | 1.37 | 0.9552 | 0.7358 |
| DSST | 25 | 39 | 54.8 | 60.44 | 5.636 | 1.191 | 0.7207 |
| DOI | 25 | 40 | 14.32 | 5.8 | -8.52 | -3.448 | 0.02293 |
| NSS HS | 25 | 40 | 3.08 | 3.2 | 0.12 | 0.2212 | 0.8848 |
| NSS IF | 25 | 40 | 4.32 | 3.825 | -0.495 | -1.298 | 0.7207 |
| NSS CoMT | 25 | 40 | 3.28 | 3.1 | -0.18 | -0.3936 | 0.8699 |
| NSS MoCo | 25 | 40 | 8.16 | 5.95 | -2.21 | -2.27 | 0.2067 |
| NSS RLSpO | 25 | 40 | 3.24 | 3.05 | -0.19 | -0.3083 | 0.8756 |
| NSS Total | 25 | 40 | 20.36 | 17.3 | -3.06 | -1.737 | 0.4394 |
| OLZ | 25 | 40 | 14.74 | 13.68 | -1.067 | -0.4401 | 0.8699 |
| PANSS G | 25 | 40 | 31.04 | 32.38 | 1.335 | 0.7629 | 0.7932 |
| PANSS N | 25 | 40 | 16.76 | 16.95 | 0.19 | 0.1085 | 0.914 |
| PANSS P | 25 | 40 | 13.96 | 14.8 | 0.84 | 0.7188 | 0.7932 |
| PANSS Total | 25 | 40 | 61.76 | 64.12 | 2.365 | 0.6186 | 0.8083 |
| NSS | TMT | 29 | 46 | 124.9 | 82.04 | -42.85 | -3.18 | 0.03927 |
| CF | 29 | 46 | 19.34 | 18.13 | -1.214 | -0.3923 | 0.8032 |
| DSST | 29 | 46 | 51.72 | 55.98 | 4.254 | 0.8266 | 0.514 |
| DOI | 29 | 46 | 8.966 | 6.783 | -2.183 | -1.032 | 0.5104 |
| NSS HS | 29 | 46 | 3.276 | 2.804 | -0.4715 | -1.234 | 0.5104 |
| NSS IF | 29 | 46 | 2.448 | 2.413 | -0.03523 | -0.106 | 0.9307 |
| NSS CoMT | 29 | 46 | 3.793 | 3.043 | -0.7496 | -1.283 | 0.5104 |
| NSS MoCo | 29 | 46 | 7.862 | 6.217 | -1.645 | -1.915 | 0.3361 |
| NSS RLSpO | 29 | 46 | 2.586 | 2.174 | -0.4123 | -0.9763 | 0.5104 |
| NSS Total | 29 | 46 | 19.97 | 16.65 | -3.313 | -1.872 | 0.3361 |
| OLZ | 29 | 46 | 17.76 | 21.5 | 3.741 | 0.8949 | 0.5104 |
| PANSS G | 29 | 46 | 37.03 | 33.76 | -3.274 | -1.223 | 0.5104 |
| PANSS N | 29 | 46 | 16.97 | 17.13 | 0.1649 | 0.08737 | 0.9307 |
| PANSS P | 29 | 46 | 16.59 | 14.67 | -1.912 | -1.132 | 0.5104 |
| PANSS Total | 29 | 46 | 70.34 | 65.5 | -4.845 | -0.9131 | 0.5104 |
